# Supplementary material
Source: publisher figshare collection journal article supplement (https://gsapubs.figshare.com/ndownloader/files/36503295)
Supplement: Supplementary file 1 [file 36503295]

## Sheet: zircon Hf isotope
Table S4. Zircon Hf isotopic compositions for representative samples of the mafic to intermediate rocks from the Kaiyuan region of northern Liaoning, North China
Spot	t (Ma)	176Yb/177Hf	176Lu/177Hf	176Hf/177Hf	2σ	Hft	ƐHf (0)	ƐHf (t)	2σ	THfDM1 (Ma)	TDMC (Ma)	fLu/Hf
Diaopitun (DPT)
KY13-11-3 01	257.093	0.0185563	0.000790094	0.28232	2.62455e-05	0.282316	-15.9793	-10.4764	0.928674	1309.54	1941.3	-0.976202
KY13-11-3 02	266.92	0.0210989	0.000887347	0.282385	2.67709e-05	0.282381	-13.6861	-7.98816	0.947285	1222.37	1791.97	-0.973273
KY13-11-3 03	256.628	0.0130357	0.000550347	0.282331	2.43496e-05	0.282329	-15.586	-10.0522	0.861589	1285.96	1914.32	-0.983423
KY13-11-3 04	258.974	0.0210989	0.000887347	0.282385	2.67709e-05	0.282381	-13.6861	-8.1583	0.947269	1222.37	1796.71	-0.973273
KY13-11-3 05	262.089	0.0195884	0.0008072	0.282381	2.20325e-05	0.282377	-13.8431	-8.23476	0.779611	1225.98	1803.89	-0.975687
KY13-11-3 06	255.345	0.0194029	0.000810747	0.282312	2.59229e-05	0.282309	-16.2525	-10.7909	0.917255	1321	1959.76	-0.97558
KY13-11-3 07	263.761	0.021394	0.000925367	0.282463	2.50902e-05	0.282458	-10.9343	-5.30897	0.887809	1114.66	1620.56	-0.972127
KY13-11-3 08	260.055	0.021181	0.000885982	0.28236	2.47936e-05	0.282356	-14.5689	-9.01821	0.877308	1257.19	1851.7	-0.973314
KY13-11-3 09	258.787	0.011056	0.000460189	0.28233	2.43225e-05	0.282328	-15.6326	-10.0367	0.860636	1284.76	1915	-0.986139
KY13-11-3 10	262.758	0.0177914	0.000754198	0.282322	2.22778e-05	0.282318	-15.9087	-10.2779	0.788289	1305.53	1933.07	-0.977283
KY13-11-3 11	258.737	0.0195091	0.00081729	0.28235	2.19404e-05	0.282346	-14.9111	-9.37705	0.776344	1268.4	1873.32	-0.975383
KY13-11-3 12	258.622	0.0218987	0.000910931	0.282314	3.0317e-05	0.28231	-16.19	-10.6752	1.07274	1322.02	1954.91	-0.972562
KY13-11-3 13	259.996	0.0206723	0.000812297	0.282469	2.43562e-05	0.282465	-10.7081	-5.14374	0.86183	1102.4	1607.29	-0.975533
KY13-11-3 14	257.561	0.0169773	0.000709024	0.282291	2.20535e-05	0.282287	-17.0157	-11.4896	0.780345	1347.43	2005.4	-0.978644
KY13-11-3 15	259.952	0.0207775	0.000883088	0.282336	2.32487e-05	0.282332	-15.4097	-9.8612	0.822641	1290.28	1904.7	-0.973401
KY13-11-3 16	260.235	0.0162256	0.000657755	0.282405	2.28551e-05	0.282402	-12.9811	-7.38636	0.808713	1187.32	1749.04	-0.980188
Bakeshu (BKS)
KY12-1-4 05	423	0.0465308	0.00180279	0.282527	2.19986e-05	0.282513	-8.66602	0.128131	0.778687	1049.03	1397.93	-0.945699
KY12-1-4 07	429.318	0.0367103	0.00153858	0.282495	1.98231e-05	0.282483	-9.79918	-0.798924	0.701691	1087.27	1461.34	-0.953657
KY12-1-4 09	889.825	0.0382367	0.0014561	0.28224	2.38089e-05	0.282215	-18.823	-0.0379047	0.84364	1446.58	1765.05	-0.956142
KY12-1-4 13	919.267	0.0119901	0.000407567	0.282229	1.94899e-05	0.282222	-19.2024	0.852632	0.690646	1421.92	1731.81	-0.987724
KY12-1-4 14	1871.39	0.00181485	4.89824e-05	0.281559	1.90826e-05	0.281557	-42.8902	-1.25592	0.677666	2313.33	2592.51	-0.998525
KY12-1-4 15	907.362	0.0115388	0.000380702	0.28217	1.90976e-05	0.282163	-21.3035	-1.4989	0.676725	1502.46	1870.03	-0.988533
KY12-1-4 16	936.351	0.028259	0.00109987	0.282254	1.81242e-05	0.282235	-18.3144	1.68701	0.642276	1412.81	1692.56	-0.966871
KY12-1-4 17	433.62	0.0460418	0.00137737	0.282302	2.01843e-05	0.282291	-16.6214	-7.49063	0.714484	1355.7	1886.23	-0.958513
KY12-1-4 18	775.166	0.0340841	0.0011874	0.282303	2.3464e-05	0.282286	-16.5884	-0.103141	0.831205	1347.56	1681.5	-0.964235
KY12-1-4 19	2012.99	0.0164168	0.000579413	0.281292	2.46077e-05	0.28127	-52.3418	-8.24683	0.874157	2706.55	3129.08	-0.982548
KY12-1-4 01	258.473	0.00737364	0.000319318	0.282235	2.02665e-05	0.282233	-18.9956	-13.3844	0.717116	1410.65	2125.29	-0.990382
KY12-1-4 08	249.71	0.028629	0.00124387	0.282475	2.40487e-05	0.282469	-10.5168	-5.24444	0.850927	1107.43	1605.79	-0.962534
KY12-1-4 10	258.855	0.0396613	0.00149612	0.282761	2.21066e-05	0.282753	-0.402097	5.02652	0.782227	706.355	961.578	-0.954936
Bakeshu (BKS)
KY17-6-2 01	261.211	0.0472795	0.0018789	0.282245	2.62731e-05	0.282236	-18.6251	-13.2235	0.929659	1455.1	2116.63	-0.943407
KY17-6-2 02	257.09	0.0287083	0.00109163	0.282239	2.62667e-05	0.282234	-18.858	-13.4082	0.929426	1434.02	2125.45	-0.96712
KY17-6-2 03	252.378	0.0169191	0.000701781	0.282219	2.48191e-05	0.282215	-19.5652	-14.1508	0.878192	1447.07	2168.7	-0.978862
KY17-6-2 04	262.921	0.0261359	0.00102972	0.28217	2.25575e-05	0.282165	-21.278	-15.6948	0.798189	1527.19	2273.25	-0.968984
KY17-6-2 05	262.672	0.033336	0.00127597	0.282214	2.21548e-05	0.282208	-19.7163	-14.1803	0.78394	1475.15	2178	-0.961567
KY17-6-2 06	261.718	0.0450622	0.00173565	0.282279	2.89353e-05	0.28227	-17.4493	-12.0118	1.02386	1402.14	2040.98	-0.947721
KY17-6-2 07	263.963	0.0192489	0.000765325	0.282272	2.25832e-05	0.282268	-17.6791	-12.0255	0.7991	1375.47	2043.86	-0.976948
KY17-6-2 08	257.471	0.031922	0.00121282	0.282297	2.32433e-05	0.282291	-16.8072	-11.3688	0.822445	1357.16	1997.57	-0.963469
KY17-6-2 09	253.732	0.0380312	0.00148278	0.28221	2.85879e-05	0.282203	-19.869	-14.5568	1.01155	1489.41	2194.85	-0.955338
KY17-6-2 10	263.002	0.0284337	0.00108336	0.282224	2.38411e-05	0.282219	-19.3635	-13.7868	0.843608	1453.7	2153.64	-0.967369
KY17-6-2 12	253.197	0.0237647	0.000990593	0.282203	2.47294e-05	0.282198	-20.1251	-14.7418	0.875022	1480.17	2206.27	-0.970163
KY17-6-2 13	263.008	0.0254696	0.000986048	0.282273	2.51382e-05	0.282268	-17.6509	-12.0561	0.889505	1382.37	2045	-0.9703
KY17-6-2 14	258.093	0.0232351	0.000875333	0.28219	2.64227e-05	0.282186	-20.579	-15.0718	0.934948	1493.53	2230.67	-0.973635
KY17-6-2 15	271.614	0.0311722	0.00122958	0.282217	2.27683e-05	0.28221	-19.639	-13.9056	0.805661	1470.27	2167.46	-0.962964
KY17-6-2 17	260.301	0.024638	0.000940038	0.282209	2.15053e-05	0.282204	-19.9242	-14.3806	0.760952	1470.29	2188.94	-0.971686
KY17-6-2 18	254.706	0.0303561	0.00112559	0.282268	2.55063e-05	0.282262	-17.8285	-12.4345	0.902515	1394.52	2062.51	-0.966097
KY17-6-2 19	260.001	0.0324012	0.00121278	0.282264	2.58594e-05	0.282259	-17.9476	-12.4562	0.915018	1402.48	2067.8	-0.963471
KY17-6-2 20	250.191	0.0303225	0.00114752	0.282219	2.67813e-05	0.282213	-19.568	-14.2745	0.947618	1464.26	2174.64	-0.965436
Qinghezhen (QHZ)									0			-1
FX12-30-7 01	223	0.0279551	0.000777005	0.28285	1.67319e-05	0.282846	2.74139	7.52884	0.591999	567.131	777.517	-0.976596
FX12-30-7 03	223	0.0552849	0.00155256	0.282825	1.84274e-05	0.282819	1.87624	6.54879	0.651991	614.171	840.231	-0.953236
FX12-30-7 04	223	0.0395779	0.00111648	0.282847	1.96007e-05	0.282842	2.63882	7.37612	0.693502	576.389	787.295	-0.966371
FX12-30-7 05	223	0.0476388	0.00138265	0.282792	2.00883e-05	0.282786	0.694895	5.39195	0.710755	659.133	914.163	-0.958354
FX12-30-7 06	223	0.0229021	0.000671471	0.282823	1.81614e-05	0.28282	1.78792	6.59049	0.642577	603.413	837.564	-0.979775
FX12-30-7 07	223	0.0292694	0.000852833	0.282822	1.6534e-05	0.282818	1.75269	6.52847	0.584996	607.717	841.531	-0.974312
FX12-30-7 08	223	0.0446683	0.00126461	0.282802	1.58845e-05	0.282796	1.04538	5.76003	0.562016	642.928	890.651	-0.961909
FX12-30-7 09	223	0.0307842	0.000854501	0.282812	1.63329e-05	0.282808	1.40036	6.17573	0.577882	621.794	864.084	-0.974262
FX12-30-7 10	223	0.0245187	0.000718078	0.282811	1.76262e-05	0.282808	1.38058	6.17607	0.623641	620.342	864.062	-0.978371
FX12-30-7 11	223	0.0754725	0.00213299	0.282829	2.46826e-05	0.28282	2.00606	6.593	0.873307	618.584	837.404	-0.935753
FX12-30-7 12	223	0.0197038	0.000574734	0.282803	1.96178e-05	0.2828	1.08067	5.89717	0.694108	629.875	881.888	-0.982689
FX12-30-7 13	223	0.0472872	0.0013348	0.282816	1.86837e-05	0.282811	1.56575	6.27029	0.661058	623.125	858.039	-0.959795
FX12-30-7 14	223	0.0435142	0.00121369	0.282817	2.12774e-05	0.282812	1.58843	6.31086	0.752825	620.194	855.445	-0.963443
FX12-30-7 15	223	0.0425567	0.00120071	0.28284	1.81208e-05	0.282835	2.41789	7.14265	0.64114	586.585	802.239	-0.963834
FX12-30-7 16	223	0.0378508	0.00110809	0.282849	1.96651e-05	0.282845	2.73287	7.47145	0.695781	572.481	781.192	-0.966624
Shahe-Valley (SHV)
KY12-10-1 01	226	0.0207631	0.000604538	0.282868	1.68933e-05	0.282865	3.39343	8.27159	0.597714	538.695	732.281	-0.981791
KY12-10-1 02	226	0.0234983	0.000688943	0.282858	1.86232e-05	0.282855	3.03292	7.89827	0.658922	554.226	756.199	-0.979249
KY12-10-1 03	226	0.017342	0.000495785	0.282828	1.71146e-05	0.282825	1.96345	6.85717	0.605545	593.696	822.847	-0.985067
KY12-10-1 04	226	0.0221734	0.000650885	0.2828	1.86149e-05	0.282798	1.00104	5.87107	0.658626	634.295	885.897	-0.980395
KY12-10-1 05	226	0.0168301	0.000492269	0.282832	1.9518e-05	0.28283	2.11779	7.01211	0.690581	587.542	812.933	-0.985173
KY12-10-1 06	226	0.0193292	0.000567666	0.282832	1.9393e-05	0.28283	2.12694	7.00998	0.686157	588.345	813.069	-0.982902
KY12-10-1 07	226	0.019389	0.000569415	0.282835	1.69367e-05	0.282833	2.23455	7.11739	0.599249	584.11	806.196	-0.982849
KY12-10-1 08	226	0.0169072	0.0005023	0.282822	2.01971e-05	0.28282	1.75911	6.65175	0.714608	601.873	835.987	-0.98487
KY12-10-1 09	226	0.0186558	0.000550893	0.282839	1.93163e-05	0.282836	2.36273	7.2484	0.683445	578.752	797.811	-0.983407
KY12-10-1 10	226	0.00684842	0.00020251	0.282822	2.15074e-05	0.282821	1.77146	6.70895	0.760968	596.692	832.328	-0.9939
KY12-10-1 11	226	0.0256271	0.000731662	0.282827	2.03586e-05	0.282824	1.96254	6.82097	0.720324	597.429	825.162	-0.977962
KY12-10-1 12	226	0.0193348	0.000564763	0.282794	1.89978e-05	0.282792	0.77413	5.65694	0.672174	641.836	899.578	-0.982989
KY12-10-1 13	226	0.0229053	0.000658334	0.282829	1.73857e-05	0.282826	2.0135	6.88292	0.615137	594.253	821.199	-0.980171
KY12-10-1 14	226	0.0197284	0.000571851	0.282808	1.6855e-05	0.282805	1.25698	6.13897	0.59636	622.85	868.775	-0.982776
KY12-10-1 15	226	0.0121588	0.000351725	0.282847	1.99489e-05	0.282845	2.64332	7.55893	0.705827	564.688	777.932	-0.989406
KY12-10-1 16	226	0.019702	0.000579778	0.282869	1.77856e-05	0.282866	3.42501	8.30689	0.629285	537.092	730.018	-0.982537
Shahe Valley (SHV)
KY12-8-1 01	224	0.0475089	0.00113242	0.282959	4.52617e-05	0.282955	6.62674	11.3849	1.60143	416.058	530.83	-0.965891
KY12-8-1 02	224	0.0488716	0.0013387	0.282921	1.93123e-05	0.282915	5.25972	9.98666	0.6833	473.767	620.698	-0.959678
KY12-8-1 03	224	0.0306268	0.000866139	0.282874	1.55944e-05	0.28287	3.60241	8.3986	0.551753	534.082	722.58	-0.973911
KY12-8-1 04	224	0.0413104	0.00117936	0.282892	1.65646e-05	0.282887	4.23463	8.98469	0.58608	513.079	685.002	-0.964477
KY12-8-1 05	224	0.0324711	0.000955625	0.282884	1.54781e-05	0.28288	3.97745	8.76056	0.54764	520.331	699.376	-0.971216
KY12-8-1 06	224	0.0398407	0.00112023	0.282909	1.80222e-05	0.282905	4.85988	9.61901	0.637655	487.103	644.302	-0.966258
KY12-8-1 07	224	0.0270074	0.000751025	0.282903	1.85797e-05	0.2829	4.62762	9.44139	0.657378	491.606	655.702	-0.977379
KY12-8-1 08	224	0.0308782	0.00084961	0.282889	1.75363e-05	0.282886	4.14303	8.94194	0.62046	512.254	687.744	-0.974409
KY12-8-1 09	224	0.0226191	0.000615072	0.282911	1.5745e-05	0.282908	4.90333	9.73739	0.557083	478.893	636.703	-0.981474
KY12-8-1 10	224	0.0220002	0.00060544	0.282927	1.61885e-05	0.282925	5.49599	10.3318	0.572773	455.228	598.531	-0.981764
KY12-8-1 11	224	0.0228478	0.000655957	0.282849	1.87963e-05	0.282847	2.73941	7.56634	0.665043	565.4	775.896	-0.980242
KY12-8-1 12	224	0.02278	0.000663233	0.282894	1.35103e-05	0.282891	4.31801	9.14464	0.478015	502.779	674.742	-0.980023
KY12-8-1 13	224	0.0389214	0.00108116	0.282897	1.62535e-05	0.282893	4.42618	9.19089	0.575074	504.034	671.774	-0.967435
KY12-8-1 14	224	0.0278701	0.000745594	0.282856	1.5613e-05	0.282852	2.95448	7.76822	0.552412	558.179	762.969	-0.977542
KY12-8-1 15	224	0.0197251	0.000553977	0.2829	1.63319e-05	0.282898	4.53978	9.38272	0.57785	492.541	659.466	-0.983314
KY12-8-1 17	224	0.0448367	0.0012231	0.282903	1.82962e-05	0.282898	4.62842	9.37219	0.64735	497.787	660.142	-0.96316
